# Supplementary material
Source: ML conference proceedings conference paper supplement (https://proceedings.neurips.cc/paper_files/paper/2016/hash/fb8feff253bb6c834deb61ec76baa893-Abstract.html)
Supplement: Supplementary file [file fb8feff253bb6c834deb61ec76baa893-Supplemental.zip]

## Appendix: Kronecker Determinantal Point Processes

### A Proof of Prop. 3.1

We use ‘vec’ to denote the operator that stacks columns of a matrix to form a vector; conversely, ‘mat’ takes a vector with  $k^2$  coefficients and returns a  $k \times k$  matrix.

Let  $L = L_1 \otimes L_2$ ,  $S_1 = L_1^{-1}$ ,  $S_2 = L_2^{-1}$  and  $S = S_1 \otimes S_2 = L^{-1}$ . Let  $E_{ij}$  be the matrix with all 0s except for a 1 at position  $(i, j)$ , its size being clear from context. We wish to solve

$$\nabla f_2(X) = -\nabla g_2(S_1) \quad \text{and} \quad \nabla f_1(X) = -\nabla g_1(S_2) \quad (10)$$

It follows from the fact that

$$\log \det(S_1 \otimes S_2) = N_2 \log \det S_1 + N_1 \log \det S_2$$

that  $\nabla f_{S_2}(X) = N_2 X^{-1}$  and  $\nabla f_{S_1}(X) = N_1 X^{-1}$ . Moreover, we know that

$$\begin{aligned} \nabla g(S) &= -(I + S)^{-1} - S^{-1} \frac{1}{n} \sum_i U_i (U_i^\top S^{-1} U_i)^{-1} U_i S^{-1} \\ &= -S^{-1} - S^{-1} \left( \frac{1}{n} \sum_i U_i (U_i^\top S^{-1} U_i)^{-1} U_i - (I + S^{-1})^{-1} \right) S^{-1} \\ &= -(L + L\Delta L). \end{aligned}$$

The Jacobian of  $S_1 \rightarrow S_1 \otimes S_2$  is given by  $J = (\text{vec}(E_{11} \otimes S_2), \dots, \text{vec}(E_{N_1 N_1} \otimes S_2))$ . Hence,

$$\begin{aligned} \nabla f_1(X)_{ij} = -(\nabla g_1(S_1))_{ij} &\iff N_2 X_{ij}^{-1} = (J^\top \text{vec}(-\nabla g(S)))_{ij} \\ &\iff N_2 X_{ij}^{-1} = \text{vec}(E_{ij} \otimes S_2)^\top \text{vec}(L + L\Delta L) \\ &\iff N_2 X_{ij}^{-1} = \text{Tr}((E_{ij} \otimes S_2)(L + L\Delta L)) \\ &\iff N_2 X_{ij}^{-1} = \text{Tr}(S_2(L + L\Delta L)_{(ij)}) \\ &\iff N_2 X_{ij}^{-1} = \text{Tr}(((I \otimes S_2)(L + L\Delta L))_{(ij)}) \end{aligned}$$

The last equivalence is simply the result of indices manipulation. Thus, we have

$$\nabla f_2(X) = -\nabla g_2(S_1) \iff X^{-1} = \frac{1}{N_2} \text{Tr}_1((I \otimes S_2)(L + L\Delta L))$$

Similarly, by setting  $J' = (\text{vec}(S_1 \otimes E_{11}), \dots, \text{vec}(S_1 \otimes E_{N_1 N_1}))$ , we have that

$$\begin{aligned} \nabla f_2(X)_{ij} = -(\nabla g_2(S_2))_{ij} &\iff N_1 X_{ij}^{-1} = (J'^\top \text{vec}(-\nabla g(S)))_{ij} \\ &\iff N_1 X_{ij}^{-1} = \text{vec}(S_1 \otimes E_{ij})^\top \text{vec}(L + L\Delta L) \\ &\iff N_1 X_{ij}^{-1} = \text{Tr}((S_1 \otimes E_{ij})(L + L\Delta L)) \\ &\iff N_1 X_{ij}^{-1} = \left( \sum_{k, \ell=1}^{N_1} S_{1k\ell} (L + L\Delta L)_{(\ell k)} \right)_{ij} \\ &\iff N_1 X_{ij}^{-1} = \left( \sum_{\ell=1}^{N_1} ((S_1 \otimes I)(L + L\Delta L))_{(\ell \ell)} \right)_{ij} \end{aligned}$$

Hence,

$$\nabla f_{S_1}(X) = -\nabla g_{S_1}(S_2) \iff X^{-1} = \frac{1}{N_1} \text{Tr}_2((S_1 \otimes I)(L + L\Delta L)),$$

which proves Prop. 3.1.  $\square$

### B Efficient updates for KRK-PICARD

The updates to  $L_1$  and  $L_2$  are obtained efficiently through different methods; hence, the proof to Thm. 3.3 is split into two sections. We write

$$\Theta = \frac{1}{n} \sum_{i=1}^n U_i L_{Y_i}^{-1} U_i^\top \quad (\text{or } \Theta = U_i L_{Y_i}^{-1} U_i^\top \text{ for stochastic updates})$$

so that  $\Delta = \Theta - (I + L)^{-1}$ . Recall that  $(A \otimes B)_{(ij)} = a_{ij} B$ .

## B.1 Updating $L_1$

We wish to compute  $X = \text{Tr}_1((I \otimes L_2^{-1})(L\Delta L))$  efficiently. We have

$$\begin{aligned}
X_{ij} &= \text{Tr} [((I \otimes L_2^{-1})(L\Delta L))_{(ij)}] \\
&= \text{Tr} [L_2^{-1}(L\Delta L)_{(ij)}] \\
&= \text{Tr} \left[ L_2^{-1} \sum_{k,\ell=1}^{N_1} L_{(ik)} \Delta_{(k\ell)} L_{(\ell j)} \right] \\
&= \sum_{k,\ell=1}^{N_1} L_{1ik} L_{1\ell j} \text{Tr}(L_2^{-1} L_2 \Delta_{(k\ell)} L_2) \\
&= \sum_{k,\ell=1}^{N_1} L_{1ik} L_{1\ell j} \underbrace{\text{Tr}(\Theta_{(k\ell)} L_2)}_{A_{k\ell}} - \underbrace{\text{Tr}((I + L)_{(k\ell)}^{-1} L_2)}_{B_{k\ell}} \\
&= (L_1 A L_1 - L_1 B L_1)_{ij}.
\end{aligned}$$

The  $N_1 \times N_1$  matrix  $A$  can be computed in  $\mathcal{O}(n\kappa^3 + N_1^2 N_2^2)$  time simply by pre-computing  $\Theta$  in  $\mathcal{O}(n\kappa^3)$  and then computing all  $N_1^2$  traces in  $\mathcal{O}(N_2^2)$  time. When doing stochastic updates for which  $\Theta$  is sparse with only  $\kappa^2$  non-zero coefficients, computing  $A$  can be done in  $\mathcal{O}(N_1^2 \kappa^2 + \kappa^3)$ .

By diagonalizing  $L_1 = P_1 D_1 P_1^\top$  and  $L_2 = P_2 D_2 P_2^\top$ , we have  $(I + L)^{-1} = P D P^\top$  with  $P = P_1 \otimes P_2$  and  $D = (I + D_1 \otimes D_2)^{-1}$ .  $P_1, P_2, D_1, D_2$  and  $D$  can all be obtained in  $\mathcal{O}(N_1^3 + N_2^3 + N_1 N_2)$  as a consequence of Prop. 2.1. Then

$$\begin{aligned}
B_{ij} &= \text{Tr}((I + L)_{(ij)}^{-1} L_2) \\
&= \sum_k \text{Tr}(P_{(ik)} D_{(kk)} P_{(kj)}^\top L_2) \\
&= \sum_k P_{1ik} P_{1jk} \text{Tr}(P_2 D_{(kk)} P_2^\top P_2 D_2 P_2^\top) \\
&= \sum_k P_{1ik} P_{1jk} \underbrace{\text{Tr}(D_{(kk)} D_2)}_{\alpha_k}.
\end{aligned}$$

Let  $\hat{D} = \text{diag}(\alpha_1, \dots, \alpha_{N_1})$ , which can be computed in  $\mathcal{O}(N_1 N_2)$ . Then  $L_1 B L_1 = P_1 D_1 \hat{D} D_1 P_1$  is computable in  $\mathcal{O}(N_1^3 + N_2^3)$ .

Overall, the update to  $L_1$  can be computed in  $\mathcal{O}(n\kappa^3 + N_1^2 N_2^2 + N_1^3 + N_2^3)$  time, or in  $\mathcal{O}(N_1^2 \kappa^2 + \kappa^3 + N_1^3 + N_2^3)$  time if the updates are stochastic. Moreover, if  $\Theta$  is sparse with only  $z$  non-zero coefficients (for stochastic updates  $z = \kappa$ ),  $A$  can be computed in  $\mathcal{O}(\kappa^2)$  space, leading to an overall  $\mathcal{O}(z^2 + N_1^2 + N_2^2)$  memory cost.

## B.2 Updating $L_2$

We wish to compute  $X = \text{Tr}_2[(L_1^{-1} \otimes I)(L\Delta L)]$  efficiently.

$$\begin{aligned}
X &= \sum_{i=1}^{N_1} ((L_1^{-1} \otimes I)(L\Delta L))_{(ii)} \\
&= \sum_{i=1}^{N_1} ((I \otimes L_2)(\Theta - (I + L)^{-1})(L_1 \otimes L_2))_{(ii)} \\
&= \sum_{i,j=1}^{N_1} L_{1ij} L_2 \Theta_{(ij)} L_2 - \sum_{i=1}^{N_1} ((I \otimes L_2)(I + L)^{-1}(L_1 \otimes L_2))_{(ii)} \\
&= \underbrace{L_2 \sum_{i,j=1}^{N_1} L_{1ij} \Theta_{(ij)} L_2}_A - \underbrace{\sum_{i=1}^{N_1} ((I \otimes L_2)(I + L)^{-1}(L_1 \otimes L_2))_{(ii)}}_B
\end{aligned}$$

The matrix  $A$  can be computed in  $\mathcal{O}(n\kappa^3 + N_1^2 N_2^2 + N_2^3)$  time. As before, when doing stochastic updates  $A$  can be computed in  $\mathcal{O}(N_1^2 \kappa^2 + \kappa^3 + N_2^3)$  time and  $\mathcal{O}(N_2^2 + N_1^2 + \kappa^2)$  space due to the sparsity of  $\Theta$ .

Regarding  $B$ , as all matrices commute, we can write

$$(I \otimes L_2)(I + L)^{-1}(L_1 \otimes L_2) = (P_1 \otimes P_2)\Lambda(P_1 \otimes P_2)$$

where  $\Lambda = (I \otimes D_2)(I + D_1 \otimes D_2)^{-1}(D_1 \otimes D_2)$  is diagonal and is obtained in  $\mathcal{O}(N_1^3 + N_2^3 + N_1 N_2)$ . Moreover,

$$B = \sum_{i=1}^{N_1} (P \Lambda P^\top)_{(ii)} = P_2 \left( \sum_{i,k=1}^{N_1} P_{1ik} \Lambda_{(kk)} P_{1ik} \right) P_2^\top,$$

which allows us to compute  $B$  in  $\mathcal{O}(N_1^2 N_2 + N_2^3 + N_1^3)$  total.

Overall, we can obtain  $X$  in  $\mathcal{O}(n\kappa^3 + N_1^2 N_2^2 + N_1^3 + N_2^3)$  or in  $\mathcal{O}(N_1^2 \kappa^2 + N_1^2 N_2 + N_1^3 + N_2^3)$  for stochastic updates, in which case only  $\mathcal{O}(N_1^2 + N_2^2 + \kappa^2)$  space is necessary.

## C Proof of validity for joint updates

In order to minimize the number of matrix multiplications, we equivalently (due to the properties of the Frobenius norm) minimize the equation

$$\|L^{-1} + \Delta - X \otimes Y\|_F^2 \quad (11)$$

and set  $\begin{cases} L'_1 \leftarrow L_1 X L_1 \\ L'_2 \leftarrow L_2 Y L_2. \end{cases}$

**Theorem C.1.** *Let  $L \succ 0$ . Define  $R := [\text{vec}(L_{(11)})^\top; \dots; \text{vec}(L_{(N_1 N_1)})^\top]_{i,j=1}^{N_1} \in \mathbb{R}^{N_1 N_1 \times N_2 N_2}$ .*

*Suppose that  $R$  has an eigengap between its largest singular value and the next, and let  $u, v, \sigma$  be the first singular vectors and value of  $R$ . Let  $U = \text{mat}(u)$  and  $V = \text{mat}(v)$ . Then  $U$  and  $V$  are either both positive definite or negative definite.*

*Moreover, for any value  $\alpha \neq 0$ , the pair  $(\alpha U, \sigma/\alpha V)$  minimizes  $\|L - X \otimes Y\|_F^2$ .*

The proof is a consequence of [22, Thm. 11]. This shows that if  $L$  is initially positive definite, setting the sign of  $\alpha$  based on whether  $U$  and  $V$  are positive or negative definite<sup>3</sup>, and updating

$$\begin{cases} L_1 \leftarrow \alpha L_1 U L_1 \\ L_2 \leftarrow \sigma/\alpha L_2 V L_2 \end{cases}$$

maintains positive definite iterates. Given that if  $L_1 \succ 0$  and  $L_2 \succ 0$ ,  $L_1 \otimes L_2 \succ 0$ , a simple induction then shows that by choosing an initial kernel estimate  $L \succ 0$ , subsequent values of  $L$  will remain positive definite.

By choosing  $\alpha$  such that the new estimates  $L_1$  and  $L_2$  verify  $\|L_1\| = \|L_2\|$ , we verify all the conditions of Eq. 8.

### C.1 Algorithm for joint updates

Theorem C.1 leads to a straightforward iteration for learning matrices  $L_1$  and  $L_2$  based on the decomposition of the Picard estimate as a Kronecker product.

---

#### Algorithm 3 JOINT-PICARD iteration

---

**Input:** Matrices  $L_1, L_2$ , training set  $T$ , step-size  $a \geq 1$ .  
**for**  $i = 1$  **to**  $\text{maxIter}$  **do**  
     $U, \sigma, V \leftarrow \text{power\_method}(L^{-1} + \Delta)$  to obtain the first singular value and vectors of matrix  $R$ .  
     $\alpha \leftarrow \text{sgn}(U_{11}) \sqrt{\sigma \|L_2 V L_2\| / \|L_1 U L_1\|}$   
     $L_1 \leftarrow L_1 + a(\alpha L_1 U L_1 - L_1)$   
     $L_2 \leftarrow L_2 + a(\sigma/\alpha L_2 V L_2)$   
**end for**  
**return**  $(L_1, L_2)$

---

<sup>3</sup>This can easily be done simply by checking the sign of the first diagonal coefficient of  $U$ , which will be positive if and only if  $U \succ 0$ .
